# Supplementary material for: Band gap engineering in pyridyl-functionalized two-dimensional (2D) CuSCN coordination polymers
Source: Royal Society of Chemistry journal article supplement (doi:10.1039/d4me00022f), 2024-01-01
Supplement: d4me00022f1.pdf [file d4me00022f1.pdf]

Electronic Supplementary Information (ESI)

## Band gap engineering in pyridyl-functionalized two-dimensional (2D) CuSCN coordination polymers

Jetnipat Songkerdthong,<sup>a</sup> Thanasee Thanasarnsurapong,<sup>b</sup> Adisak Boonchun,<sup>b</sup>  
David J. Harding,<sup>c</sup> and Pichaya Pattanasattayavong<sup>\*,a</sup>

<sup>a</sup> Department of Materials Science and Engineering, School of Molecular Science and Engineering, Vidyasirimedhi Institute of Science and Technology (VISTEC), Rayong 21210, Thailand

<sup>b</sup> Department of Physics, Faculty of Science, Kasetsart University, Bangkok 10900, Thailand

<sup>c</sup> School of Chemistry, Institute of Science, Suranaree University of Technology, Nakhon Ratchasima 30000, Thailand

\* Corresponding author: [pichaya.p@vistec.ac.th](mailto:pichaya.p@vistec.ac.th)

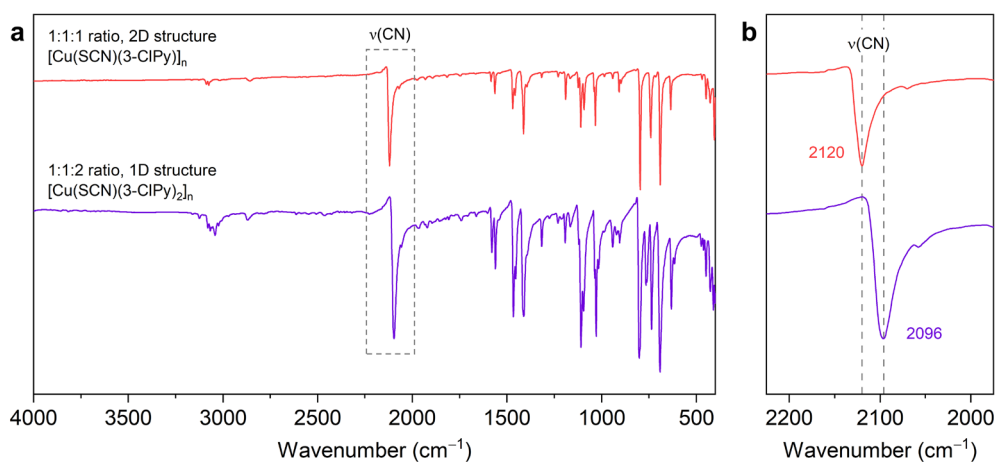

**Figure S1.** (a) Attenuated total reflectance-infrared spectroscopy (ATR-IR) spectra of  $[\text{Cu}(\text{SCN})(3\text{-CIPy})]_n$  (1:1:1 ratio) and  $[\text{Cu}(\text{SCN})(3\text{-CIPy})_2]_n$  (1:1:2 ratio). (b) Close-up of the  $\nu(\text{CN})$  region. The structures of the two samples used for this measurement were confirmed by single-crystal X-ray diffraction.

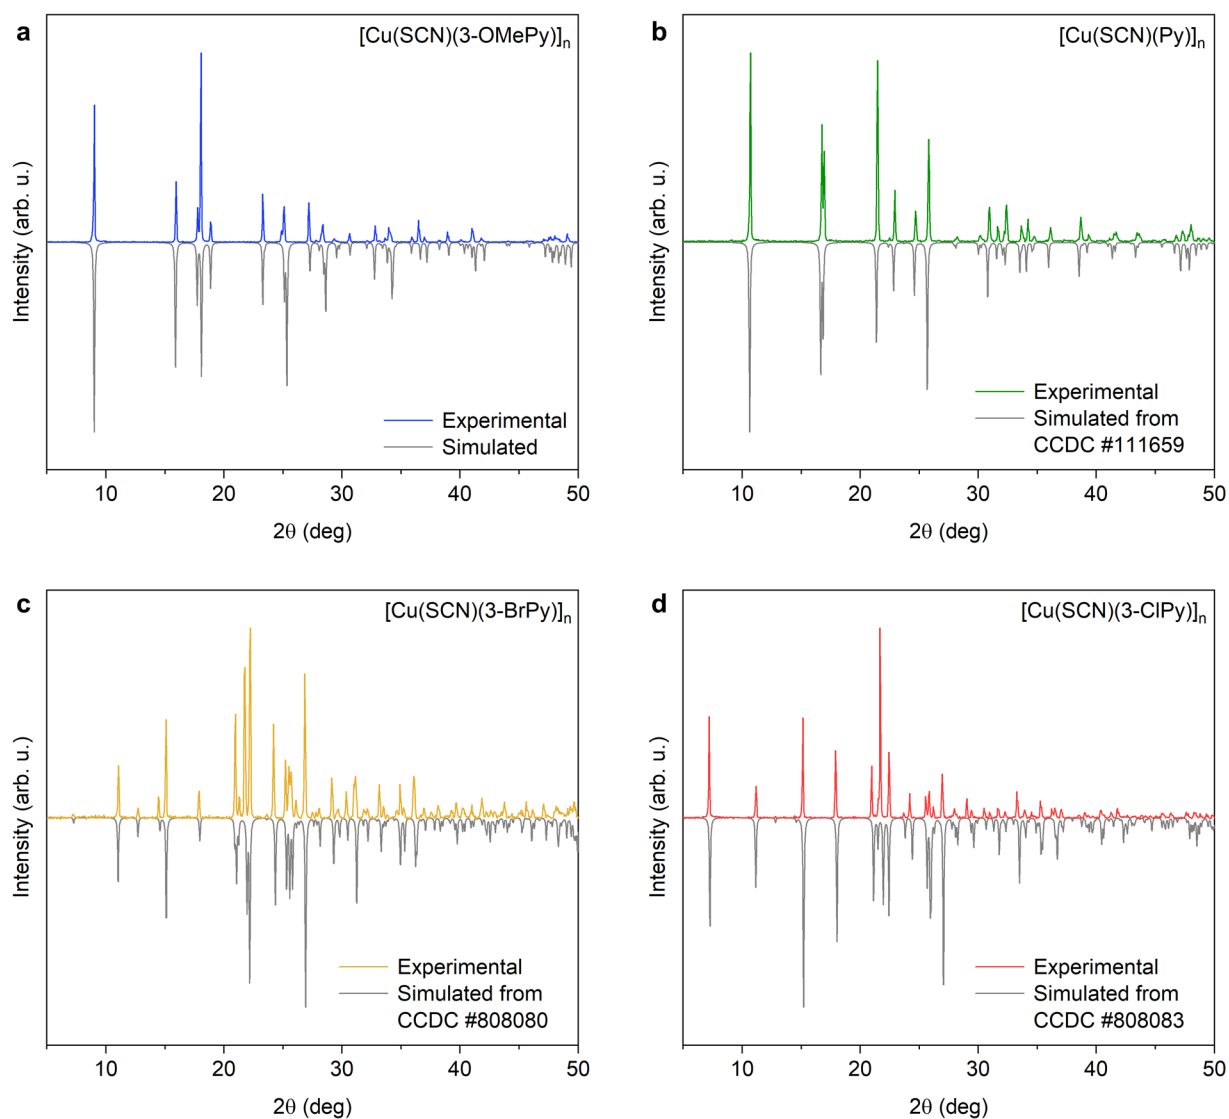

**Figure S2.** Powder X-ray diffraction (PXRD) patterns of  $[\text{Cu}(\text{SCN})(3\text{-XPy})]_n$  complexes where X = (a) OMe, (b) H, (c) Br, and (d) Cl. The experimental data are shown against reference data simulated from single-crystal structures (CCDC numbers given in the plot legends). For  $[\text{Cu}(\text{SCN})(3\text{-OMe})]_n$ , the single-crystal data was collected in this work.

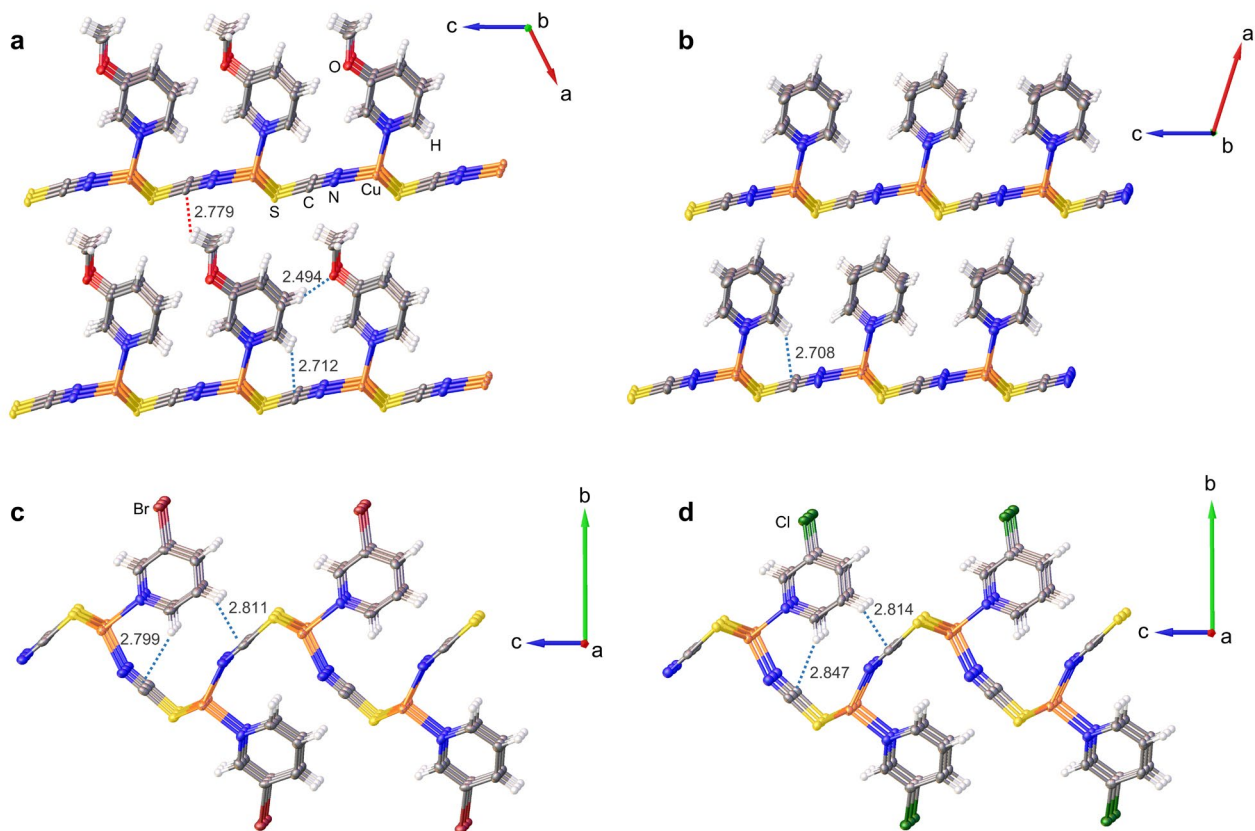

**Figure S3.** (a) and (b) 2D buckled sheet structures of  $[\text{Cu}(\text{SCN})(3\text{-OMePy})]_n$  and  $[\text{Cu}(\text{SCN})(\text{Py})]_n$ , respectively. (c) and (d) 2D puckered/rippled sheet structures of  $[\text{Cu}(\text{SCN})(3\text{-BrPy})]_n$  and  $[\text{Cu}(\text{SCN})(3\text{-ClPy})]_n$ , respectively. Short contacts are shown as dashed lines with units in Å.

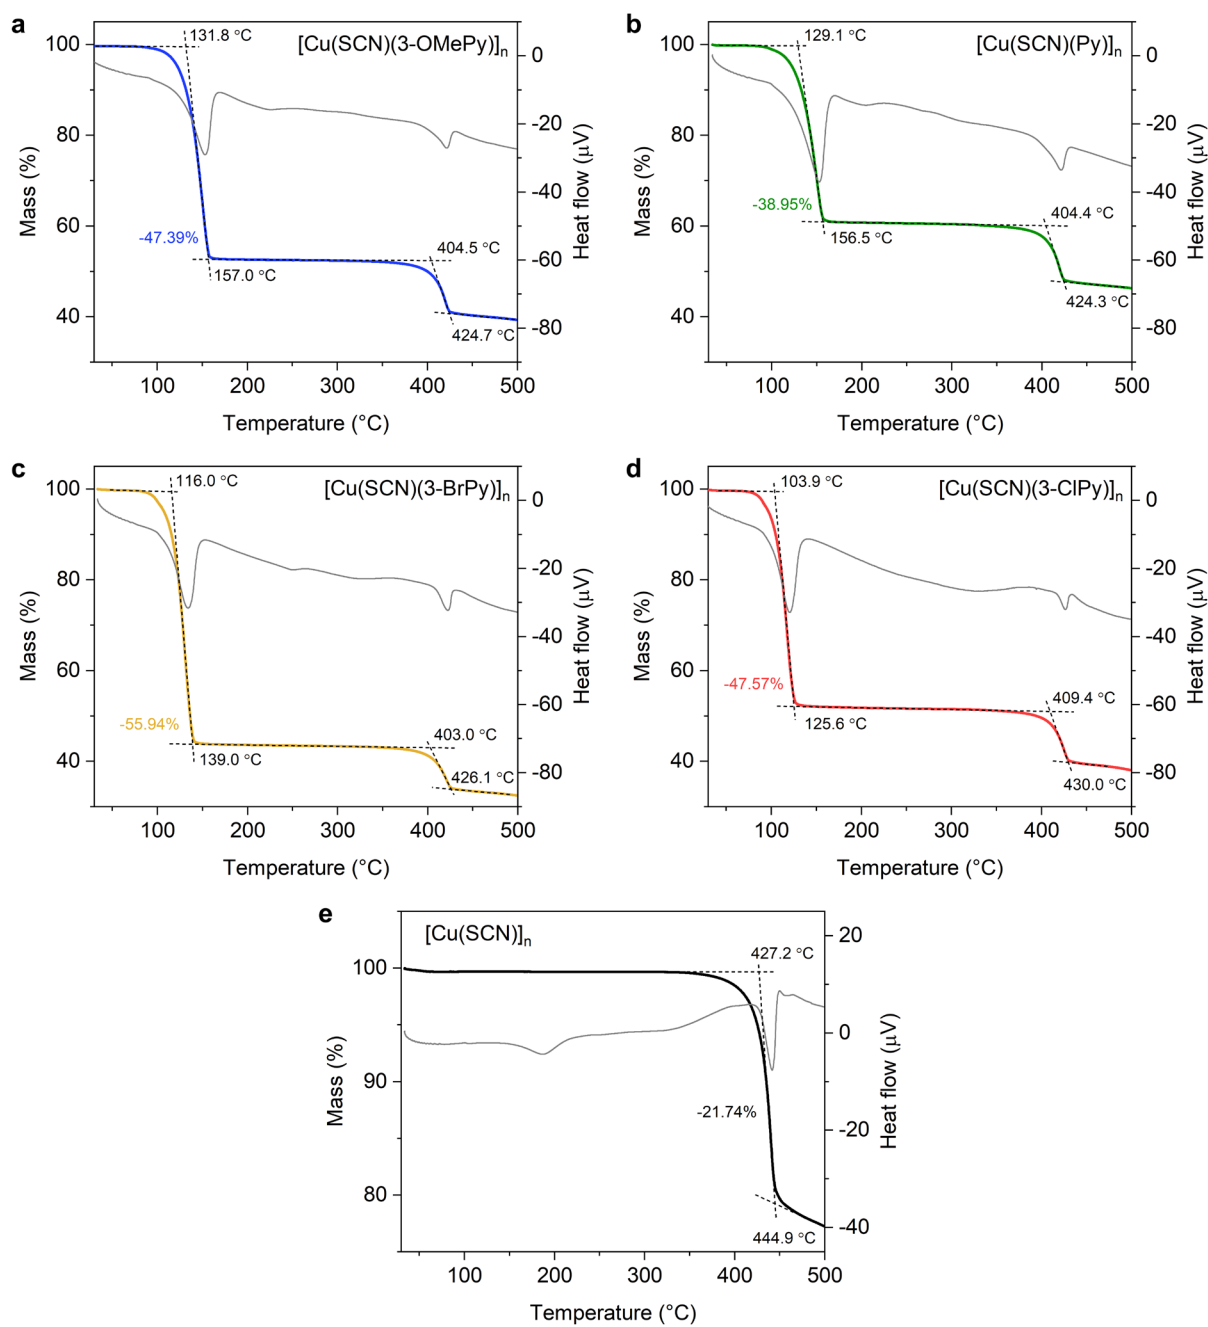

**Figure S4.** Thermogravimetric analysis (TGA) data of  $[\text{Cu}(\text{SCN})(3\text{-XPy})]_n$  complexes with X = (a) OMe, (b) H, (c) Br, and (d) Cl, respectively. The data for  $[\text{Cu}(\text{SCN})]_n$  (CuSCN treated with acetonitrile but without additional ligands) is shown as reference in (e).

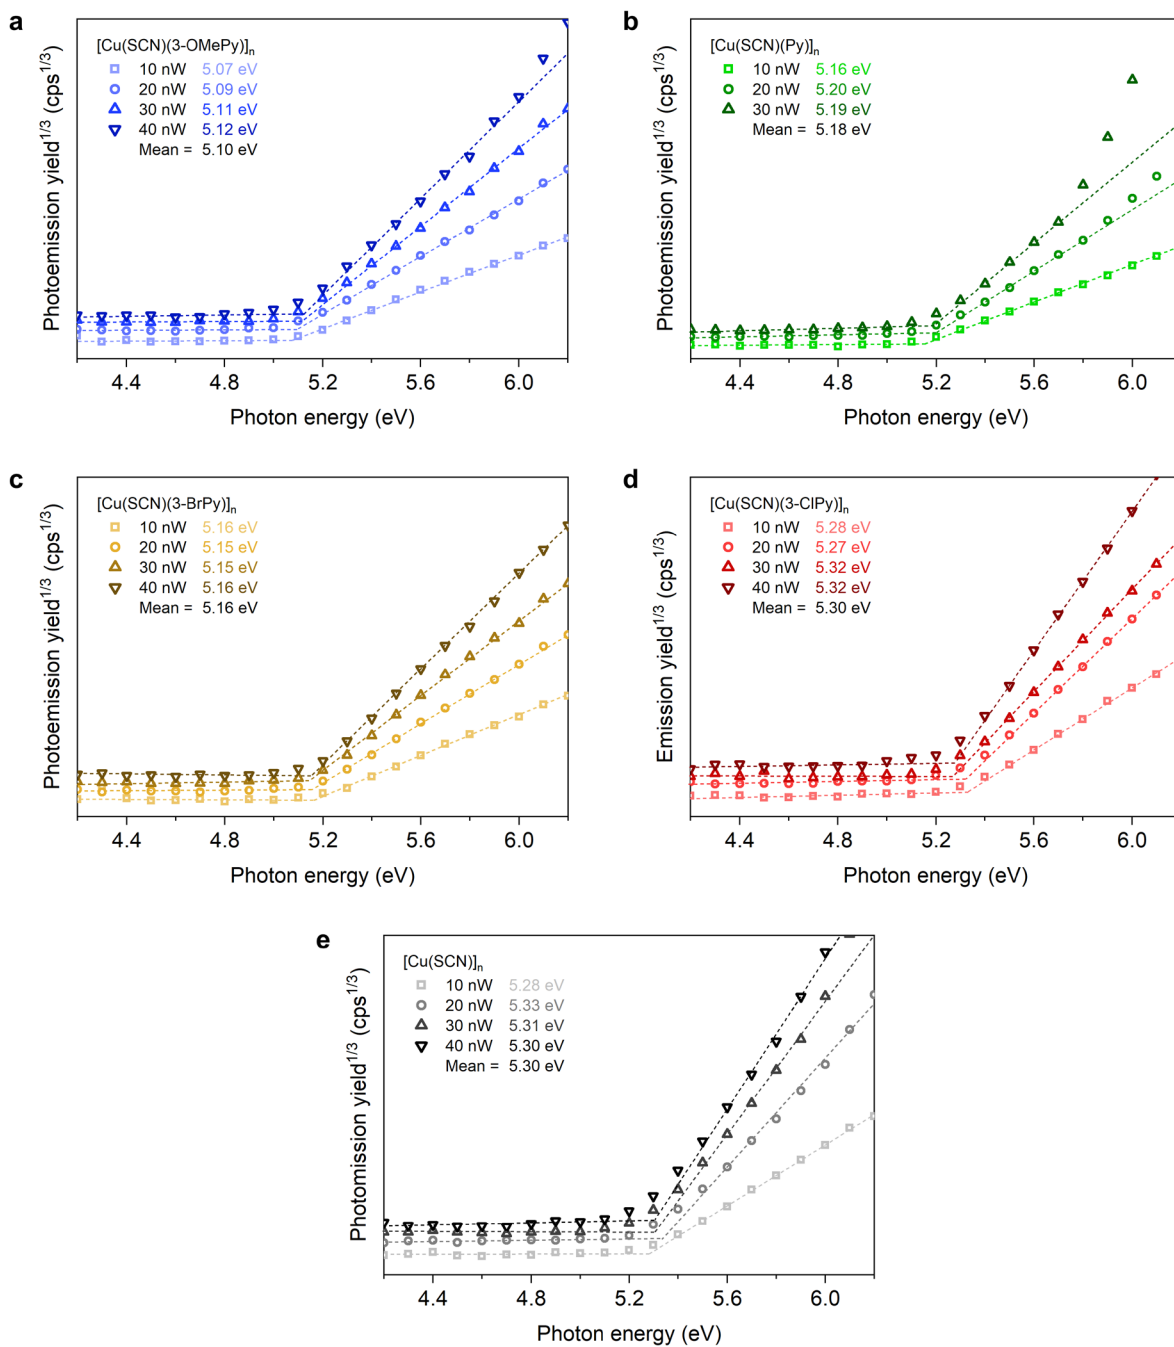

**Figure S5.** Photoelectron yield spectroscopy (PYS) results of  $[\text{Cu}(\text{SCN})(3\text{-XPy})]_n$  complexes with  $X =$  (a) OMe, (b) H, (c) Br, and (d) Cl, respectively. The data for  $[\text{Cu}(\text{SCN})]_n$  is shown as reference in (e).

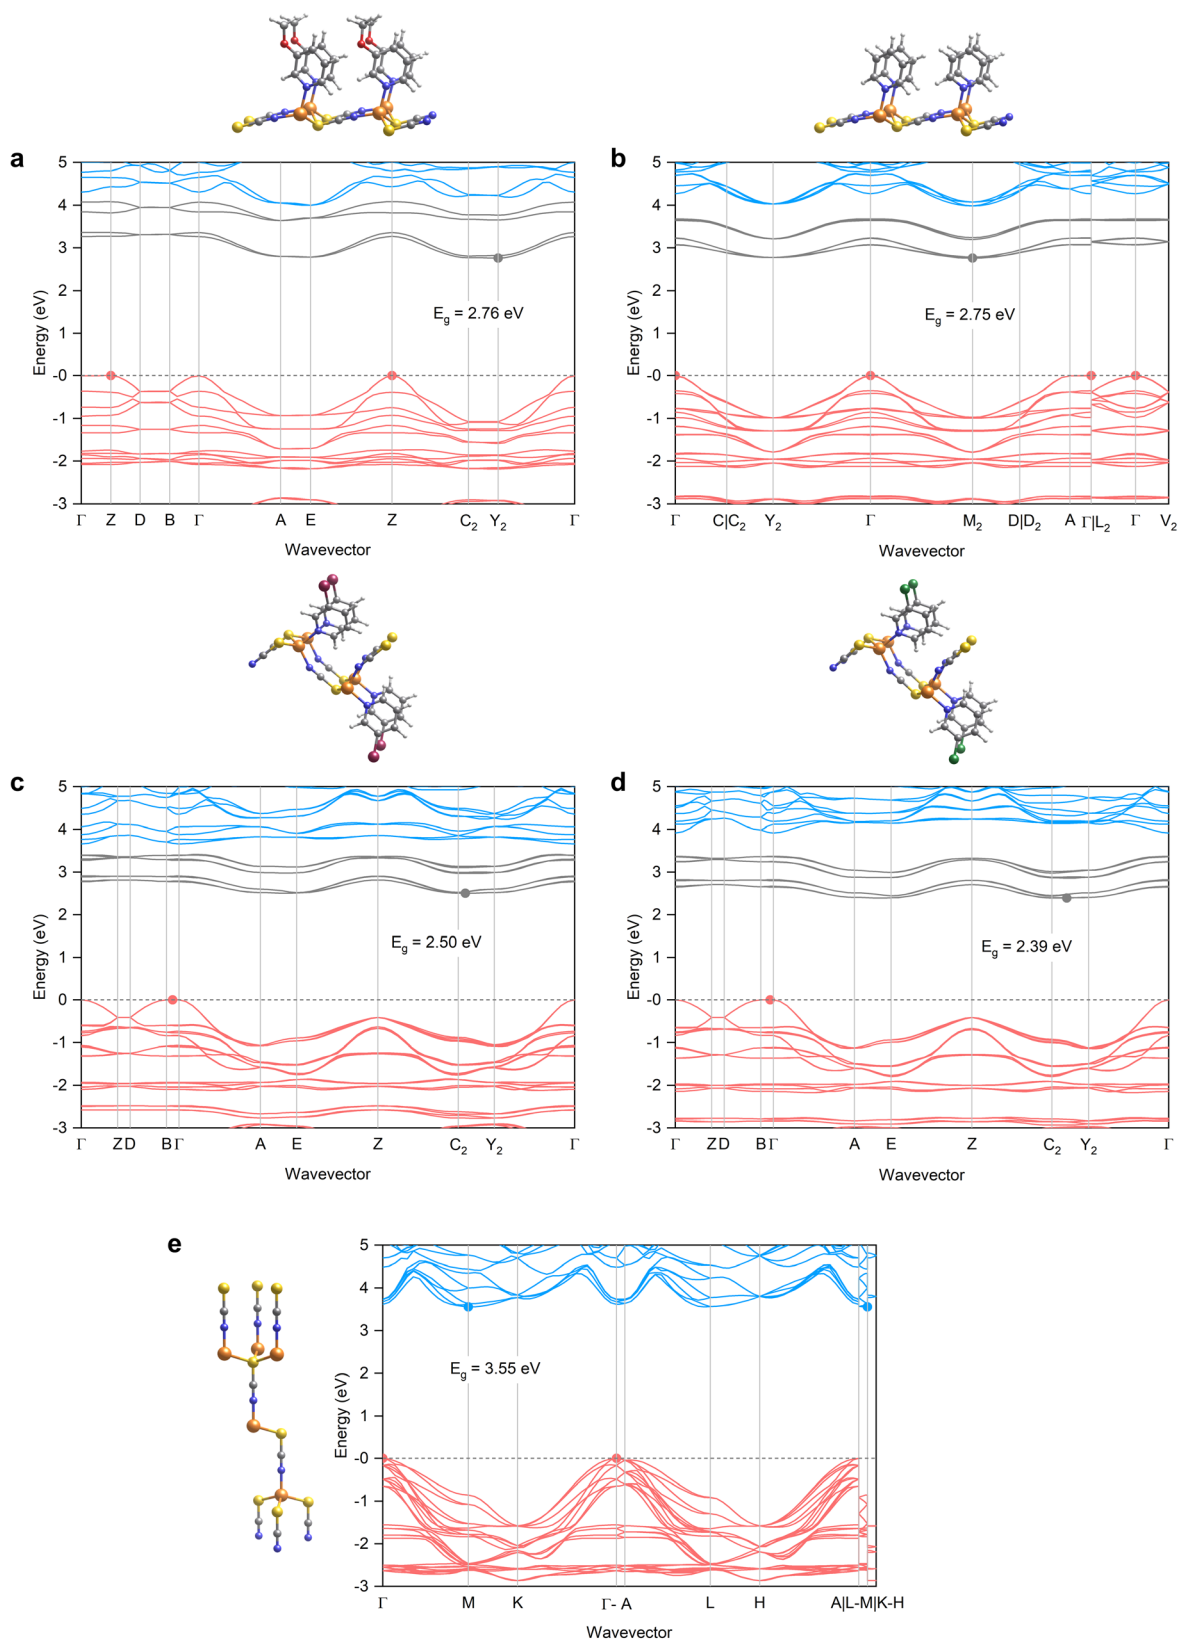

**Figure S6.** (a)-(e) Computed electronic band structures of  $[\text{Cu}(\text{SCN})(3\text{-OMePy})]_n$ ,  $[\text{Cu}(\text{SCN})(\text{Py})]_n$ ,  $[\text{Cu}(\text{SCN})(3\text{-BrPy})]_n$ ,  $[\text{Cu}(\text{SCN})(3\text{-ClPy})]_n$ , and reference  $3\text{R-}\beta\text{-CuSCN}$ , respectively. Valence bands (VBs) are plotted as light red lines, conduction bands (CBs) from ligands as gray, and CBs from SCN states as light blue. Solid circles mark the valence band maximum and conduction band minimum.

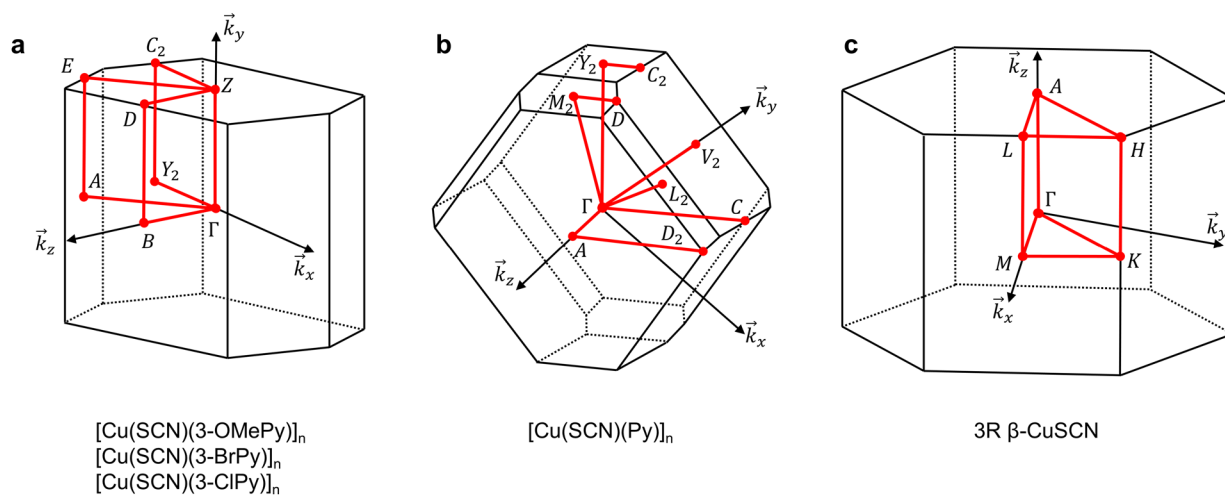

**Figure S7.** Brillouin zones of (a)  $[\text{Cu}(\text{SCN})(3\text{-OMePy})]_n$ ,  $[\text{Cu}(\text{SCN})(3\text{-BrPy})]_n$ , and  $[\text{Cu}(\text{SCN})(3\text{-ClPy})]_n$ ; (b)  $[\text{Cu}(\text{SCN})(\text{Py})]_n$ ; and (c)  $3\text{R-}\beta\text{-CuSCN}$ .

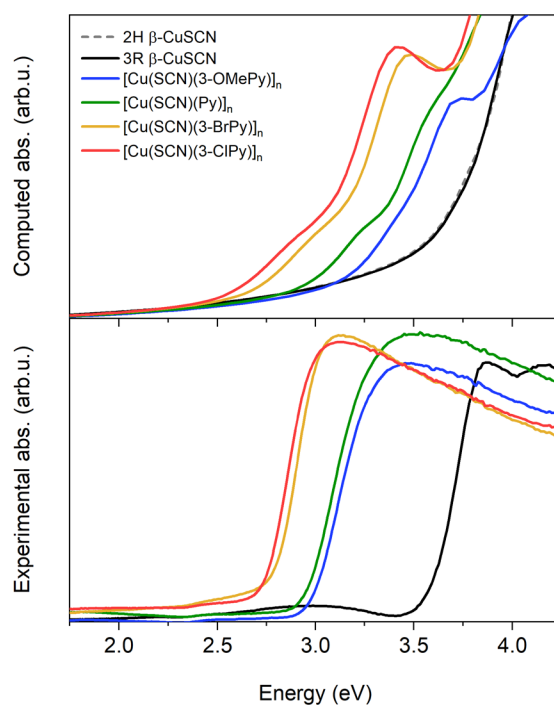

**Figure S8.** Comparison of the computed (top panel) and experimental (bottom panel) absorption spectra.

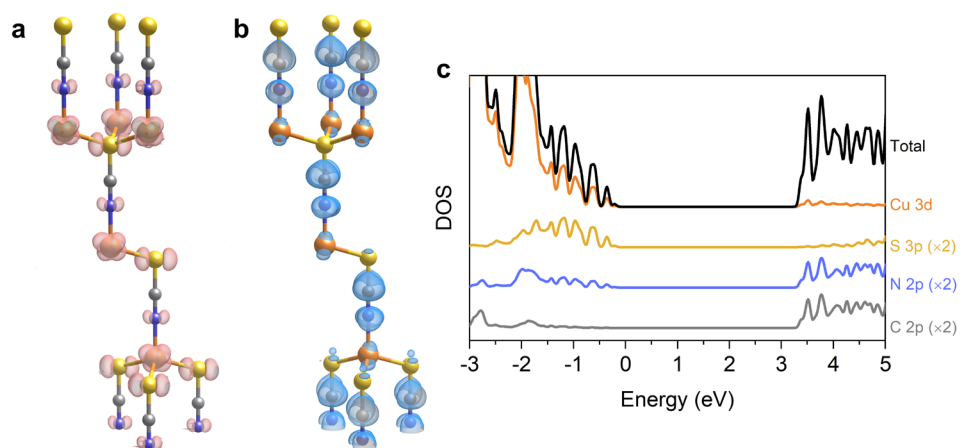

**Figure S9.** Isosurfaces of (a) valence band maximum (VBM) and (b) conduction band minimum (CBM) states of 3R- $\beta$ -CuSCN. (c) Total and partial density of states (DOS).



**Table S1.** Crystal data and structural refinement parameters of [Cu(SCN)(3-OMePy)]<sub>n</sub>.

| <b>Compound</b>                                              | <b>[Cu(SCN)(3-OMePy)]<sub>n</sub></b>                                        |
|--------------------------------------------------------------|------------------------------------------------------------------------------|
| CCDC no.                                                     | 2329055                                                                      |
| Empirical formula                                            | C <sub>7</sub> H <sub>7</sub> CuN <sub>2</sub> OS                            |
| Formula weight                                               | 230.75                                                                       |
| Temperature (K)                                              | 150(2)                                                                       |
| Crystal system                                               | monoclinic                                                                   |
| Space group                                                  | Pc                                                                           |
| <i>a</i> (Å)                                                 | 10.9519(9)                                                                   |
| <i>b</i> (Å)                                                 | 3.7899(3)                                                                    |
| <i>c</i> (Å)                                                 | 11.1736(8)                                                                   |
| <i>α</i> (deg)                                               | 90                                                                           |
| <i>β</i> (deg)                                               | 116.487(2)                                                                   |
| <i>γ</i> (deg)                                               | 90                                                                           |
| Volume (Å <sup>3</sup> )                                     | 415.10(6)                                                                    |
| <i>Z</i>                                                     | 2                                                                            |
| $\rho_{\text{calc}}$ (g/cm <sup>3</sup> )                    | 1.846                                                                        |
| $\mu$ (mm <sup>-1</sup> )                                    | 2.828                                                                        |
| <i>F</i> (000)                                               | 232.0                                                                        |
| Crystal size (mm <sup>3</sup> )                              | 0.15 × 0.12 × 0.06                                                           |
| Radiation                                                    | Mo K $\alpha$ ( $\lambda$ = 0.71073 Å)                                       |
| 2 $\theta$ range for data collection (deg)                   | 4.156 to 60.31                                                               |
| Index ranges                                                 | -15 ≤ <i>h</i> ≤ 15, -5 ≤ <i>k</i> ≤ 5, -15 ≤ <i>l</i> ≤ 15                  |
| Reflections collected                                        | 19382                                                                        |
| Independent reflections                                      | 2447 [ <i>R</i> <sub>int</sub> = 0.0330, <i>R</i> <sub>sigma</sub> = 0.0256] |
| Data/restraints/parameters                                   | 2447/2/110                                                                   |
| Goodness-of-fit on <i>F</i> <sup>2</sup>                     | 1.174                                                                        |
| Final <i>R</i> indexes [ <i>I</i> ≥ 2 $\sigma$ ( <i>I</i> )] | <i>R</i> <sub>1</sub> = 0.0279, <i>wR</i> <sub>2</sub> = 0.0635              |
| Final <i>R</i> indexes [all data]                            | <i>R</i> <sub>1</sub> = 0.0314, <i>wR</i> <sub>2</sub> = 0.0671              |
| Largest diff. peak/hole (e Å <sup>-3</sup> )                 | 0.81/-0.94                                                                   |
| Flack parameter                                              | 0.056(5)                                                                     |

**Table S2.** Comparison of lattice parameters and band gaps between experimental values and computed values.

| Compound                        | Method       | a (Å) | b (Å)  | c (Å)  | V (Å <sup>3</sup> ) | $\alpha$ (deg) | $\beta$ (deg) | $\gamma$ (deg) | E <sub>g</sub> (eV) |
|---------------------------------|--------------|-------|--------|--------|---------------------|----------------|---------------|----------------|---------------------|
| 3R- $\beta$ -CuSCN              | Experimental | 3.856 | 3.856  | 32.905 | 423.708             | 90.00          | 90.00         | 120.00         | 3.65                |
|                                 | HSE06-D3     | 3.831 | 3.831  | 32.821 | 417.105             | 90.00          | 90.00         | 120.00         | 3.55                |
|                                 | PBE-D3       | 3.783 | 3.783  | 32.917 | 407.972             | 90.00          | 90.00         | 120.00         | 2.18                |
| [Cu(SCN)(3-OMePy)] <sub>n</sub> | Experimental | 3.790 | 10.952 | 11.174 | 415.098             | 116.49         | 90.00         | 90.00          | 3.05                |
|                                 | HSE06-D3     | 3.797 | 10.926 | 11.149 | 413.531             | 116.60         | 90.00         | 90.00          | 2.76                |
|                                 | PBE-D3       | 3.762 | 10.915 | 11.168 | 409.468             | 116.77         | 90.00         | 90.00          | 1.45                |
| [Cu(SCN)(Py)] <sub>n</sub>      | Experimental | 3.855 | 11.159 | 17.435 | 715.108             | 107.55         | 90.00         | 90.00          | 3.03                |
|                                 | HSE06-D3     | 3.806 | 11.112 | 17.313 | 697.386             | 107.72         | 90.00         | 90.00          | 2.75                |
|                                 | PBE-D3       | 3.760 | 11.124 | 17.230 | 686.279             | 107.75         | 90.00         | 90.00          | 1.41                |
| [Cu(SCN)(3-BrPy)] <sub>n</sub>  | Experimental | 3.817 | 8.492  | 24.288 | 786.876             | 90.00          | 90.00         | 91.71          | 2.84                |
|                                 | HSE06-D3     | 3.847 | 8.535  | 24.334 | 798.454             | 90.00          | 90.00         | 91.93          | 2.50                |
|                                 | PBE-D3       | 3.798 | 8.532  | 24.149 | 782.077             | 90.00          | 90.00         | 91.86          | 1.22                |
| [Cu(SCN)(3-ClPy)] <sub>n</sub>  | Experimental | 3.781 | 8.386  | 24.283 | 769.866             | 90.00          | 90.00         | 91.01          | 2.79                |
|                                 | HSE06-D3     | 3.812 | 8.385  | 24.329 | 777.414             | 90.00          | 90.00         | 91.29          | 2.39                |
|                                 | PBE-D3       | 3.765 | 8.383  | 24.179 | 762.907             | 90.00          | 90.00         | 91.19          | 1.10                |

**Table S3.** Hole and electron effective masses ( $m_h^*$  and  $m_e^*$  expressed in multiples of an electron rest mass  $m_0$ ) calculated along Brillouin zone paths near the valence band maximum (VBM), conduction band minimum (CBM), or points near VBM and CBM with high band dispersions. For simple  $k$ -paths, the approximate direction in the real lattice space is also denoted.

| Compound                        | Direction                                      | $m_h^*$                               | Direction                                                  | $m_e^*$          |
|---------------------------------|------------------------------------------------|---------------------------------------|------------------------------------------------------------|------------------|
| 3R- $\beta$ -CuSCN              | $\Gamma \rightarrow K$<br>(Cu-S plane)         | 0.39 <sup>a</sup> , 1.20 <sup>b</sup> | $M \rightarrow \Gamma$<br>(Cu-S plane)                     | 1.22             |
|                                 | $\Gamma \rightarrow M$<br>(Cu-S plane)         | 0.39 <sup>a</sup> , 1.20 <sup>b</sup> | $M \rightarrow K$<br>(Cu-S plane)                          | 3.96             |
|                                 | $\Gamma \rightarrow A$<br>(c-axis, along SCN)  | 0.70                                  | $M \rightarrow L$<br>(c-axis, along SCN)                   | 3.24             |
|                                 |                                                |                                       | $\Gamma \rightarrow M$<br>(Cu-S plane)                     | 0.38             |
|                                 |                                                |                                       | $\Gamma \rightarrow K$<br>(Cu-S plane)                     | 0.38             |
|                                 |                                                |                                       |                                                            |                  |
| [Cu(SCN)(3-OMePy)] <sub>n</sub> | $Z \rightarrow \Gamma$<br>(Interlayer)         | > 4 <sup>c</sup>                      | $Y_2 \rightarrow C_2$<br>(Interlayer)                      | > 4 <sup>c</sup> |
|                                 | $Z \rightarrow C_2$<br>(Along Cu-S chain)      | 0.50                                  | $Y_2 \rightarrow \Gamma$<br>(Along $\pi$ - $\pi$ stacking) | 2.24             |
|                                 | $Z \rightarrow E$<br>(Within 2D layer)         | 0.53                                  | $E \rightarrow Z$<br>(Within 2D layer)                     | 2.67             |
|                                 | $Z \rightarrow D$<br>(Along SCN)               | 0.79                                  |                                                            |                  |
|                                 | $\Gamma \rightarrow B$<br>(Along SCN)          | 0.80                                  |                                                            |                  |
|                                 | $\Gamma \rightarrow A$<br>(Within 2D layer)    | 0.52                                  |                                                            |                  |
|                                 | $\Gamma \rightarrow Y_2$<br>(Along Cu-S chain) | 0.50                                  |                                                            |                  |
|                                 |                                                |                                       |                                                            |                  |
| [Cu(SCN)(Py)] <sub>n</sub>      | $\Gamma \rightarrow C$<br>(Within 2D layer)    | 0.49                                  | $M_2 \rightarrow \Gamma$<br>(Within 2D layer)              | > 4 <sup>c</sup> |
|                                 | $\Gamma \rightarrow Y_2$<br>(Within 2D layer)  | 0.49                                  | $M_2 \rightarrow D$                                        | > 4 <sup>c</sup> |
|                                 | $\Gamma \rightarrow M_2$<br>(Within 2D layer)  | 0.53                                  | $Y_2 \rightarrow C_2$<br>(Within 2D layer)                 | > 4 <sup>c</sup> |
|                                 | $\Gamma \rightarrow A$<br>(Interlayer)         | > 4 <sup>c</sup>                      | $Y_2 \rightarrow \Gamma$<br>(Within 2D layer)              | > 4 <sup>c</sup> |
|                                 | $\Gamma \rightarrow L_2$                       | 1.13                                  |                                                            |                  |
|                                 | $\Gamma \rightarrow V_2$<br>(Along SCN)        | 0.67                                  |                                                            |                  |
| [Cu(SCN)(3-BrPy)] <sub>n</sub>  | VBM $\rightarrow \Gamma$<br>(Interlayer)       | > 4 <sup>c</sup>                      | CBM $\rightarrow C_2$<br>(Along undulating dir.)           | > 4 <sup>c</sup> |
|                                 | VBM $\rightarrow B$<br>(Interlayer)            | > 4 <sup>c</sup>                      | CBM $\rightarrow Y_2$<br>(Along undulating dir.)           | > 4 <sup>c</sup> |
|                                 | $\Gamma \rightarrow A$<br>(Within 2D layer)    | 0.50                                  | $E \rightarrow Z$                                          | > 4 <sup>c</sup> |
|                                 | $\Gamma \rightarrow Y_2$<br>(Along Cu-S chain) | 0.49                                  |                                                            |                  |
| [Cu(SCN)(3-ClPy)] <sub>n</sub>  | VBM $\rightarrow \Gamma$<br>(Interlayer)       | > 4 <sup>c</sup>                      | CBM $\rightarrow C_2$<br>(Along undulating dir.)           | > 4 <sup>c</sup> |
|                                 | VBM $\rightarrow B$<br>(Interlayer)            | > 4 <sup>c</sup>                      | CBM $\rightarrow Y_2$<br>(Along undulating dir.)           | > 4 <sup>c</sup> |
|                                 | $\Gamma \rightarrow A$<br>(Within 2D layer)    | 0.50                                  | $E \rightarrow Z$                                          | 3.53             |
|                                 | $\Gamma \rightarrow Y_2$<br>(Along Cu-S chain) | 0.49                                  |                                                            |                  |

**Note:** <sup>a</sup> Light hole; <sup>b</sup> Heavy hole <sup>c</sup> Large effective masses (> 4 $m_0$  in this case) due to very low band curvatures such that the parabola fitting contained uncertainty too large for exact value determination.
